# Supplementary material for: Paleofluid Fingerprint as an Independent Paleogeographic Correlation Tool: An Example from Pennsylvanian Sandstones and Neighboring Crystalline Rocks (Tisia Composite Terrane, S Hungary)
Source: Hindawi journal article supplement (doi:10.1155/2020/3568986), 2020-03-17
Supplement: f1 [file 3568986.f1.pdf]

## Supplementary Materials

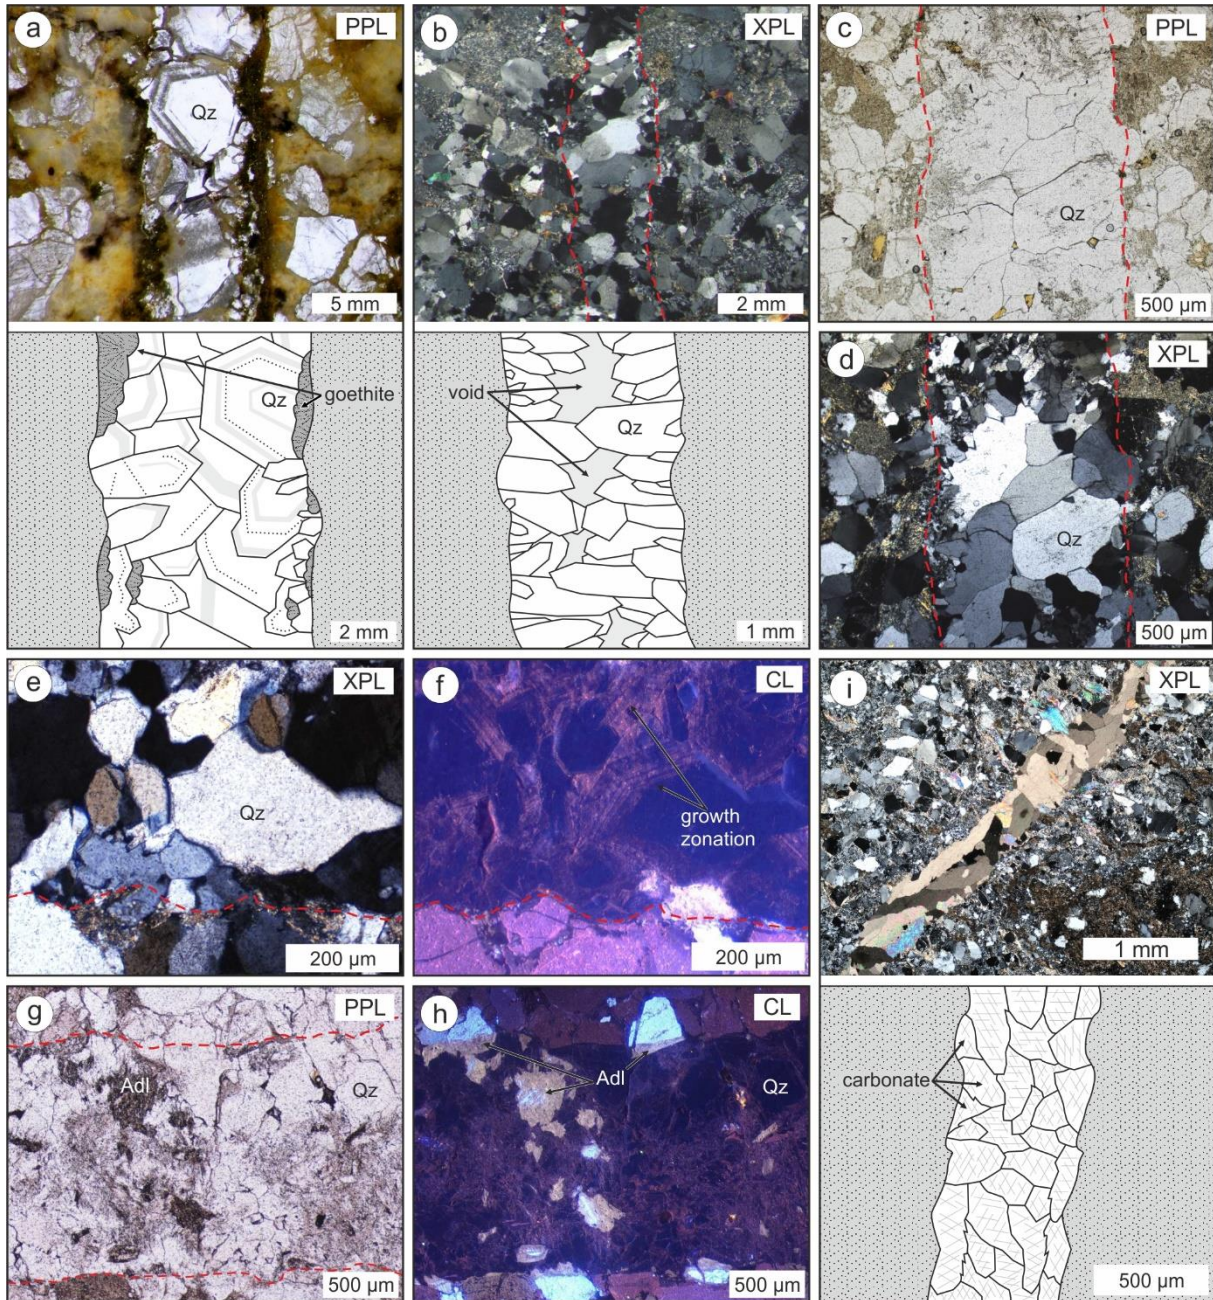

Figure S1: Typical blocky vein types of Tésény Sandstone. (a) Blocky quartz vein with euhedral quartz (Qz) crystals and goethite together with morphological sketch of this vein type (borehole T-5, 60.8 m). (b)–(d) Elongate blocky quartz veins together with morphological sketch of this vein type (samples T-7/1, 148.8 m and T-7/3, 150.6 m, respectively). (e) and (f) Characteristic fine-scale growth zonation patterns of quartz crystals of blocky textured quartz vein indicated in CL image. (g) and (h) Anhydrous adularia (Adl) grains with turbid internal habit in the elongate blocky quartz vein type (sample T-7/3, 150.6 m). Detrital K-feldspar grains with a bright blue CL in the host sandstone are partially or totally replaced by brown-luminescent adularia in the vein. (i) Blocky textured carbonate (dolomite) vein and its morphological sketch (borehole Bm-1, 973.8 m). Other abbreviations: PPL = plane-polarized light; XPL = crossed polars; CL = cathodoluminescence image.



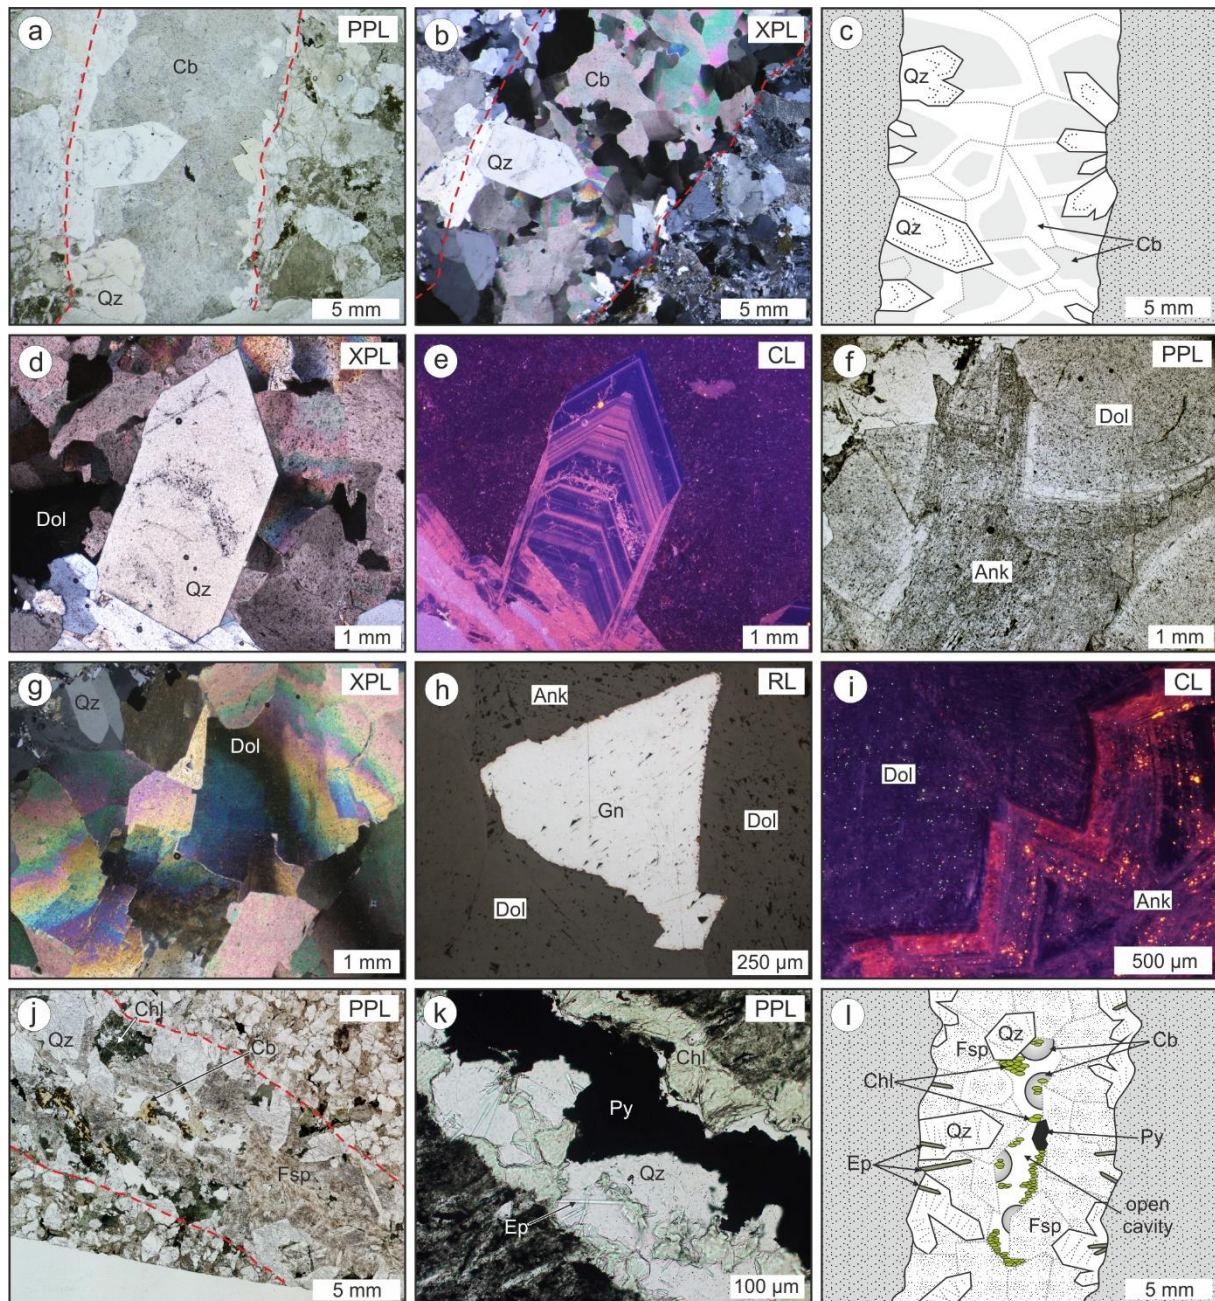

Figure S2: Characteristic polyminerallc blocky vein types of Téseny Sandstone. (a)–(c) Quartz-carbonate vein type and its morphological sketch (borehole Bm–1, 875.0 m). (d) and (e) Euhedral quartz crystal deposited on the vein wall exhibiting fine-scale growth zoning indicated by fluid inclusion assemblages (borehole Bm–1, 875.0 m). (f) Petrographic characteristics of different carbonate phases can be found among the euhedral quartz crystals in the quartz-carbonate vein type. Note the curved crystal faces of the dolomite. (g) Dolomite crystals with sweeping extinction (borehole Bm–1, 875.0 m). (h) Subhedral galena crystal with typical triangular pits (borehole Bm–1, 875.0 m). (i) In the quartz-carbonate vein type, a distinct pattern of luminescence zoning representing different carbonate generations is observed. Note the calcite solid inclusions with bright orange CL within the ankerite zones. (j)–(l) Characteristic appearances of quartz-silicate-carbonate veins together with the morphological sketch of this vein type (sample T–3/1, 95.3 m and borehole Bm–1, 1290.5 m, respectively). Abbreviations: Qz = quartz; Cb = carbonate; Dol = dolomite; Ank = ankerite; Gn = galena; Chl = chlorite; Fsp = feldspar; Ep = epidote; Py = pyrite; PPL = plane-polarized light; XPL = crossed polars; CL = cathodoluminescence image; RL = reflected light.



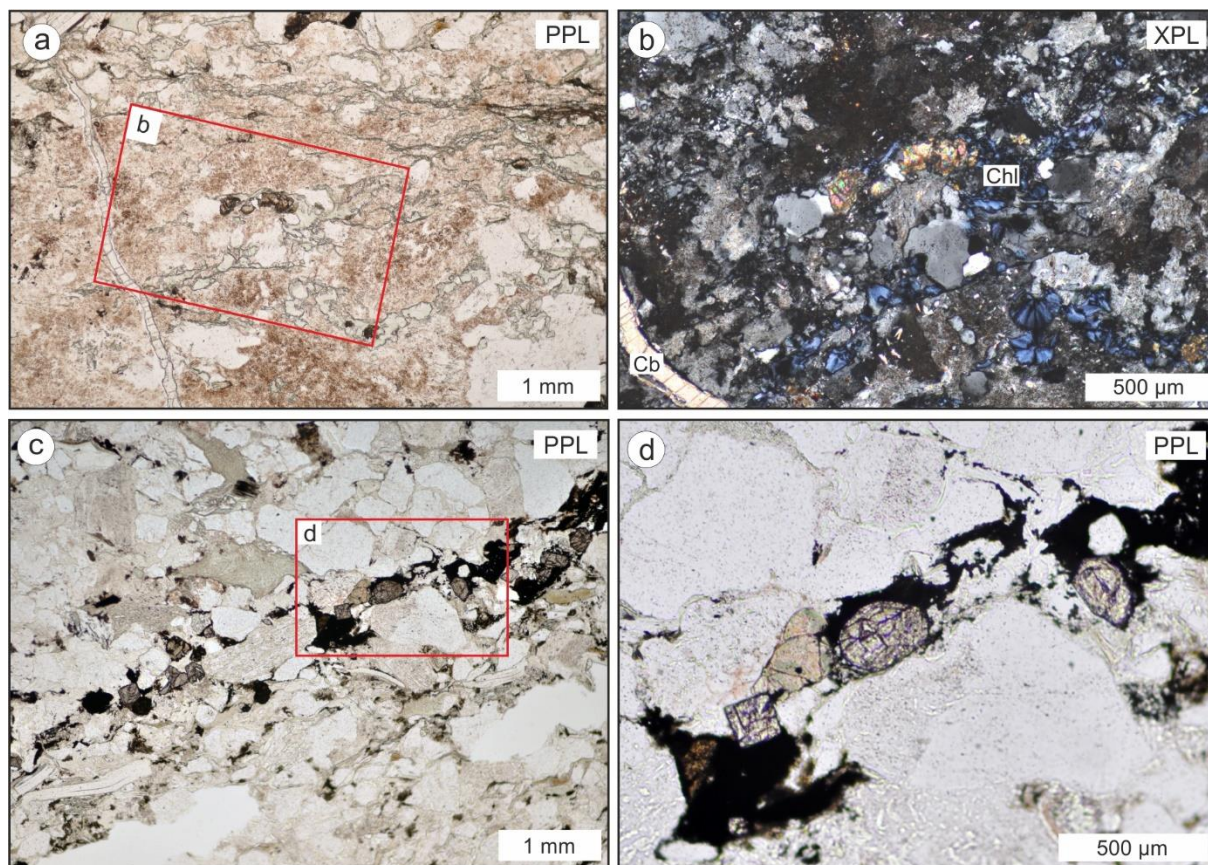

Figure S3: Characteristic polymineralic blocky vein types of Téseny Sandstone. (a)–(d) In the lowermost part of the Pennsylvanian section (borehole Bm–1 1062.1 m, covered thin section), organic material, chlorite, and/or pyrite are accompanied by euhedral monazite and/or xenotime crystals. *Note:* crosscutting relationships are also visible (hematite-rich alkali feldspar dominant vein → veins with chlorite + monazite/xenotime → carbonate vein). Abbreviations: Cb = carbonate (calcite); Chl = chlorite; PPL = plane-polarized light; XPL = crossed polars.



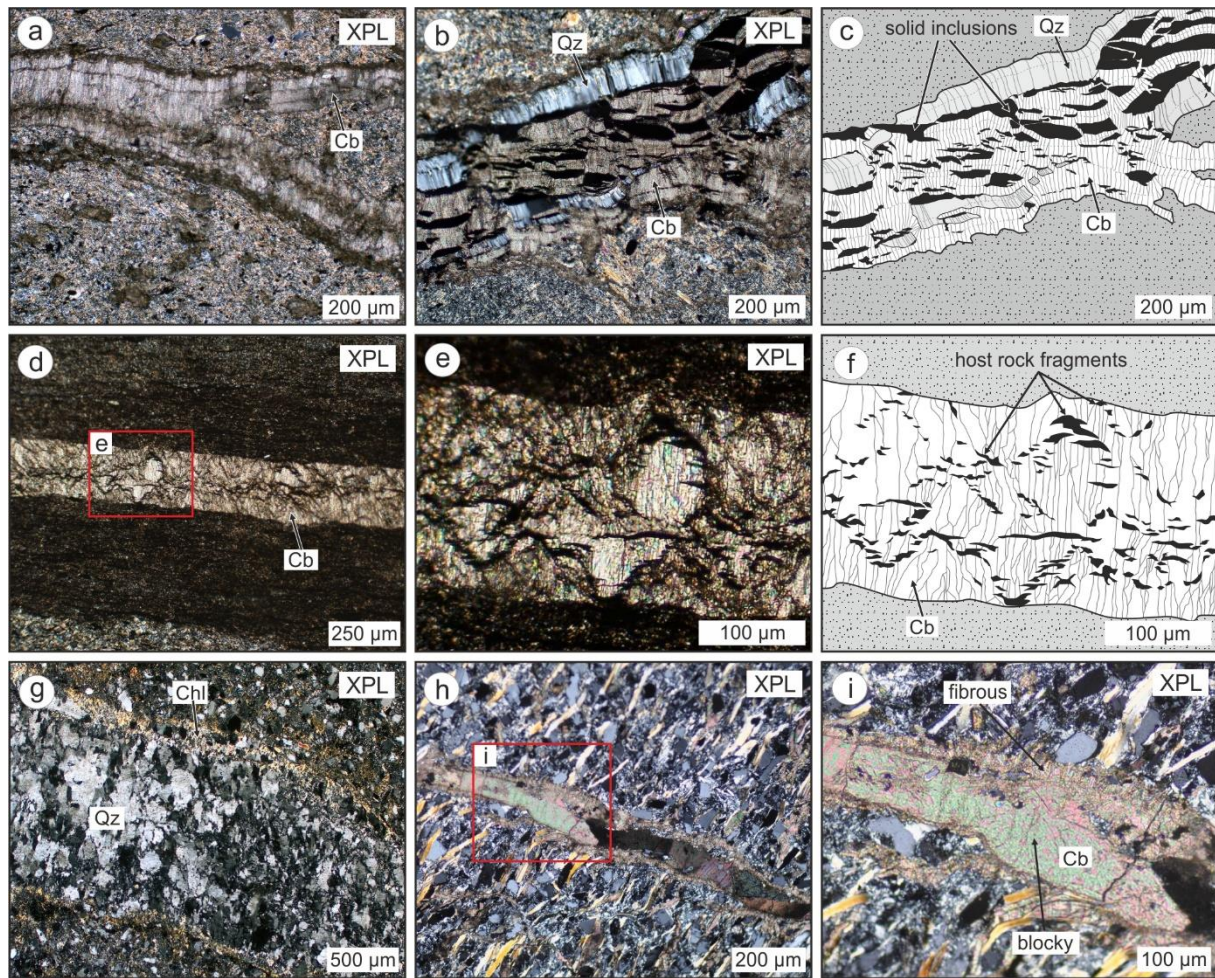

Figure S4: Fibrous, stretched, and polytextured vein types of Téseny Sandstone. (a)–(c) Fibrous carbonate and quartz-carbonate veins with antitaxial growth morphology (borehole Bm–1, 927.0–929.4 m). (d)–(f) Fibrous carbonate vein with typical sinusoidal host rock fragments (borehole Bm–1, 901.5–904.2 m). (g) Stretched quartz vein with small amount of chlorite on the vein wall (borehole Bm–1, 1224.7 m). (h) and (i) Polytextured carbonate vein with fibrous texture on the vein wall and blocky one in the middle part of the vein (borehole Bm–1, 1027.6 m). Abbreviations: Cb = carbonate; Qz = quartz; Chl = chlorite; XPL = crossed polars.

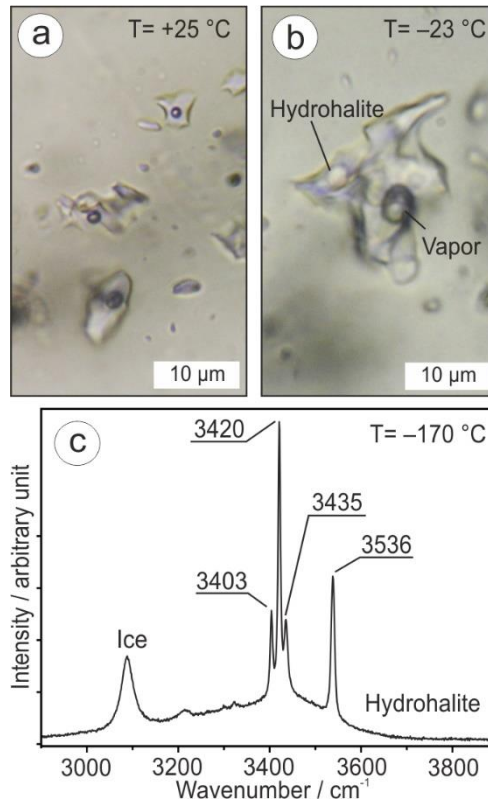

Figure S5: Fluid inclusion petrography and microthermometry. (a) Two-phase liquid dominant fluid inclusions in the QP1 FIA. (b) Hydrohalite crystal in a primary inclusion from the QP1 assemblage. (c) Raman spectrum of the hydrohalite and ice assemblage (borehole T-5, 60.8 m).

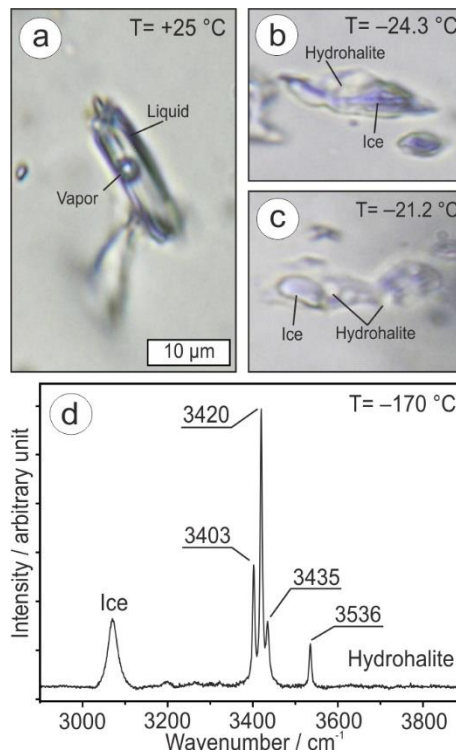

Figure S6: Fluid inclusion petrography and microthermometry. (a) Liquid dominant primary fluid inclusion from the QCP3 FIA of quartz. (b) Phase equilibria among liquid, vapor, ice, and hydrohalite in a FI of the QCP1 FIA. (c) Metastable phase equilibria in a QCP2 inclusion. (d) Representative Raman spectrum of hydrohalite and ice from a primary FI of quartz from a quartz-carbonate vein (borehole Bm-1, 875.0 m).

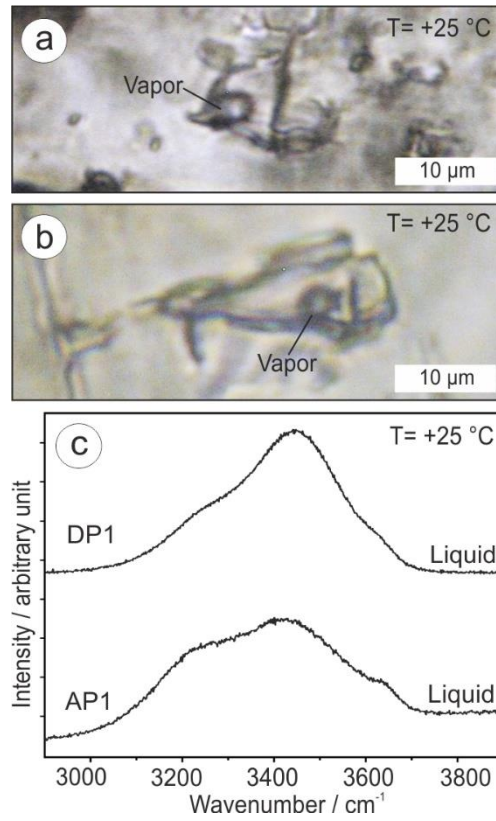

Figure S7: Fluid inclusion petrography and microthermometry. (a) Representative primary inclusion (DP1) of the dolomite phase. (b) Fluid inclusion in the AP1 assemblage, showing tapered tips in the grow direction of the crystals. (c) Characteristic Raman spectra of fluid inclusions at  $T_{\text{lab}}$  from the DP1 and AP1 fluid inclusion assemblages (borehole Bm-1, 875.0 m).

Table S1: Chemical composition of the studied carbonate phases of the selected quartz-carbonate veins.  
Abbreviations: Dol = dolomite; Ank = ankerite.

|                      | CaO<br>[mass%] | MgO<br>[mass%] | MnO<br>[mass%] | FeO<br>[mass%] | CaCO <sub>3</sub><br>[mass%] | MgCO <sub>3</sub><br>[mass%] | MnCO <sub>3</sub><br>[mass%] | FeCO <sub>3</sub><br>[mass%] |
|----------------------|----------------|----------------|----------------|----------------|------------------------------|------------------------------|------------------------------|------------------------------|
| Dol 01               | 28.2           | 16.4           | 1.5            | 6.8            | 49.1                         | 39.7                         | 2.0                          | 9.2                          |
| Dol 02               | 27.3           | 17.3           | 1.4            | 6.8            | 47.3                         | 41.6                         | 1.9                          | 9.2                          |
| Dol 03               | 28.0           | 16.7           | 1.5            | 6.5            | 48.7                         | 40.3                         | 2.0                          | 9.1                          |
| Dol 04               | 26.1           | 18.5           | 1.5            | 6.4            | 45.0                         | 44.5                         | 2.0                          | 8.6                          |
| Dol 05               | 26.4           | 18.7           | 1.4            | 6.2            | 45.3                         | 44.7                         | 1.7                          | 8.3                          |
| Dol 06               | 26.4           | 18.6           | 1.4            | 6.3            | 45.4                         | 44.4                         | 1.7                          | 8.5                          |
| Dol 07               | 26.1           | 19.0           | 1.2            | 6.1            | 44.8                         | 45.4                         | 1.6                          | 8.2                          |
| Ank <sub>Mn</sub> 01 | 25.2           | 10.5           | 5.3            | 12.0           | 46.8                         | 28.1                         | 7.8                          | 17.4                         |
| Ank <sub>Mn</sub> 02 | 26.6           | 10.1           | 5.5            | 11.7           | 48.6                         | 26.3                         | 8.1                          | 17.1                         |
| Ank <sub>Mn</sub> 03 | 25.2           | 11.5           | 5.4            | 11.3           | 46.6                         | 29.5                         | 7.6                          | 16.3                         |
| Ank <sub>Mn</sub> 04 | 25.2           | 11.4           | 5.0            | 11.6           | 46.6                         | 29.3                         | 7.4                          | 16.8                         |
| Ank <sub>Mn</sub> 05 | 25.7           | 11.4           | 4.1            | 12.2           | 47.4                         | 29.2                         | 5.9                          | 17.5                         |
| Ank <sub>Mn</sub> 06 | 26.2           | 11.9           | 4.5            | 10.6           | 47.9                         | 30.3                         | 6.6                          | 15.2                         |
| Ank <sub>Mn</sub> 07 | 25.1           | 13.6           | 4.1            | 10.2           | 45.5                         | 34.2                         | 5.9                          | 14.4                         |
| Ank <sub>Fe</sub> 01 | 26.7           | 9.3            | 2.0            | 15.8           | 49.8                         | 24.2                         | 3.0                          | 23.0                         |
| Ank <sub>Fe</sub> 02 | 25.0           | 13.6           | 2.2            | 12.3           | 45.2                         | 34.2                         | 3.2                          | 17.4                         |
| Ank <sub>Fe</sub> 03 | 26.9           | 8.9            | 3.4            | 14.6           | 50.4                         | 23.2                         | 5.1                          | 21.3                         |
| Ank <sub>Fe</sub> 04 | 27.7           | 11.2           | 1.8            | 13.0           | 50.5                         | 28.3                         | 2.7                          | 18.5                         |
| Ank <sub>Fe</sub> 05 | 25.4           | 11.2           | 2.5            | 14.5           | 46.9                         | 28.7                         | 3.6                          | 20.9                         |
| Ank <sub>Fe</sub> 06 | 26.7           | 12.9           | 1.8            | 11.9           | 48.2                         | 32.5                         | 2.6                          | 16.8                         |
| Ank <sub>Fe</sub> 07 | 26.0           | 14.1           | 1.8            | 11.3           | 46.7                         | 35.1                         | 2.5                          | 15.8                         |

Table S2: Semi-quantitative chemical composition of the studied galena samples. Abbreviations: Gn = galena;  
<LOD = below the limit of detection.

|       | Pb<br>[mass%] | S<br>[mass%] | Bi<br>[mass%] | Se<br>[ppm] | Ag<br>[ppm] | Sn<br>[ppm] | Sb<br>[ppm] |
|-------|---------------|--------------|---------------|-------------|-------------|-------------|-------------|
| Gn 01 | 90.0          | 8.1          | 0.5           | 3500        | 2900        | 1900        | <LOD        |
| Gn 02 | 87.6          | 10.7         | 0.5           | 1400        | 2800        | 1800        | <LOD        |
| Gn 03 | 89.0          | 8.4          | 1.3           | <LOD        | 4100        | 2900        | <LOD        |
| Gn 04 | 86.8          | 10.1         | 1.4           | 5100        | 4300        | 2500        | <LOD        |
| Gn 05 | 83.1          | 15.3         | 0.9           | 1900        | 2200        | <LOD        | 1300        |
| Gn 06 | 83.4          | 14.5         | 1.1           | 1400        | 3400        | 1300        | <LOD        |
| Gn 07 | 83.6          | 13.9         | 1.1           | 5100        | 3700        | 1100        | <LOD        |





|         |       |       |       |       |       |       |      |        |   |   |      |       |
|---------|-------|-------|-------|-------|-------|-------|------|--------|---|---|------|-------|
| QP2_07  | -67.0 | -52.1 | -24.7 | -11.5 | 65    | 0.616 | 0.09 | 18.55  | - | - | 16.8 | 9.4   |
| QP2_08  | -67.0 | -     | -24.6 | -3.4  | 68    | 0.613 | 0.09 | 18.52  | - | - | 17.8 | 8.97  |
| QP2_09  | -68.6 | -51.6 | -25.0 | -     | 74.3  | -     | -    | -      | - | - | -    | -     |
| QP2_10  | -69.1 | -     | -25.3 | -     | 83    | -     | -    | -      | - | - | -    | -     |
| QP3_01  | -65.3 | -     | -23.0 | -7.6  | -     | -     | -    | -      | - | - | 20.7 | 5.3   |
| QP3_02  | -67.5 | -     | -24.5 | -     | -     | -     | -    | -      | - | - | -    | -     |
| QP3_03  | -62.1 | -     | -25.3 | -6.7  | -     | -     | -    | -      | - | - | 16.2 | 10.5  |
| QP3_04  | -69.5 | -     | -25.0 | -5.2  | 55.5  | 0.614 | 0.09 | 18.41  | - | - | 16.9 | 9.8   |
| QP3_05  | -72.3 | -     | -     | -     | 63.5  | -     | -    | -      | - | - | -    | -     |
| QP3_06  | -71.5 | -     | -     | -     | 67    | -     | -    | -      | - | - | -    | -     |
| QP3_07  | -74.7 | -52.3 | -27.0 | -     | 55    | -     | -    | -      | - | - | -    | -     |
| QP3_08  | -70.2 | -     | -25.0 | -13.5 | 66    | 0.615 | 0.09 | 18.61  | - | - | 16.0 | 10.03 |
| QP3_09  | -72.1 | -     | -26.0 | -8.3  | 68.5  | 0.613 | 0.1  | 18.70  | - | - | 15.0 | 11.8  |
| QP3_10  | -67.8 | -     | -     | -     | 49.7  | -     | -    | -      | - | - | -    | -     |
| QP3_11  | -     | -     | -23.5 | -14.3 | 66.5  | 0.615 | 0.09 | 18.43  | - | - | 18.7 | 6.7   |
| QP3_12  | -62.8 | -51.7 | -24.0 | -17.0 | 77    | 0.596 | 0.1  | 18.68  | - | - | 17.3 | 7.9   |
| QP3_13  | -62.8 | -     | -     | -     | -     | -     | -    | -      | - | - | -    | -     |
| QP3_14  | -64.7 | -     | -23.5 | -     | 59    | -     | -    | -      | - | - | -    | -     |
| QP3_15  | -68.3 | -     | -24.0 | -     | -     | -     | -    | -      | - | - | -    | -     |
| QP3_16  | -     | -     | -     | -     | 62    | -     | -    | -      | - | - | -    | -     |
| QCP1_01 | -76.8 | -     | -     | -     | 66.4  | -     | -    | -      | - | - | -    | -     |
| QCP1_02 | -80.3 | -52.4 | -23.6 | -     | 76.3  | -     | -    | -      | - | - | -    | -     |
| QCP1_03 | -72.0 | -     | -24.0 | -16.0 | 99    | 0.523 | 0.11 | 18.984 | - | - | 17.5 | 7.9   |
| QCP1_04 | -81.6 | -53.3 | -22.8 | -12.0 | 54.1  | 0.612 | 0.07 | 18.020 | - | - | 20.6 | 4.8   |
| QCP1_05 | -85.1 | -     | -     | -     | 78    | -     | -    | -      | - | - | -    | -     |
| QCP1_06 | -71.8 | -     | -23.7 | -9.5  | 84.2  | 0.575 | 0.1  | 18.69  | - | - | 19.0 | 7.1   |
| QCP1_07 | -78.0 | -     | -     | -     | 58    | -     | -    | -      | - | - | -    | -     |
| QCP1_08 | -83.3 | -     | -     | -     | 83    | -     | -    | -      | - | - | -    | -     |
| QCP1_09 | -86.5 | -52.9 | -24.8 | -3.5  | 127   | 0.45  | 0.13 | 19.34  | - | - | 17.4 | 9.4   |
| QCP1_10 | -     | -     | -25.4 | -6.4  | 123   | 0.455 | 0.13 | 19.31  | - | - | 16.1 | 10.6  |
| QCP1_11 | -78.2 | -     | -22.8 | -     | 102   | -     | -    | -      | - | - | -    | -     |
| QCP1_12 | -76.0 | -     | -23.6 | -10.0 | 152.6 | 0.506 | 0.14 | 19.70  | - | - | 19.1 | 6.8   |
| QCP1_13 | -70.4 | -     | -23.2 | -     | 93.7  | -     | -    | -      | - | - | -    | -     |
| QCP1_14 | -     | -     | -23.0 | -1.6  | 88    | 0.562 | 0.1  | 18.58  | - | - | 21.2 | 5.2   |
| QCP1_15 | -72.0 | -     | -22.8 | -7.5  | 109   | 0.489 | 0.11 | 18.96  | - | - | 21.2 | 4.7   |
| QCP1_16 | -62.5 | -     | -     | -     | 92    | -     | -    | -      | - | - | -    | -     |
| QCP1_17 | -80.4 | -     | -24.2 | -     | 92.5  | -     | -    | -      | - | - | -    | -     |
| QCP1_18 | -     | -     | -24.5 | -15.0 | 91    | 0.552 | 0.11 | 18.90  | - | - | 16.7 | 9.0   |
| QCP2_01 | -62.0 | -     | -23.2 | -6.7  | 65.3  | 0.616 | 0.08 | 18.24  | - | - | 20.4 | 5.8   |
| QCP2_02 | -63.8 | -     | -25.2 | -8.5  | 46    | 0.59  | 0.08 | 18.33  | - | - | 16.2 | 10.3  |
| QCP2_03 | -67.4 | -     | -24.6 | -     | 46.7  | -     | -    | -      | - | - | -    | -     |
| QCP2_04 | -     | -     | -     | -     | 71.6  | -     | -    | -      | - | - | -    | -     |
| QCP2_05 | -71.8 | -52.7 | -24.3 | -11.4 | 63.2  | 0.617 | 0.09 | 18.47  | - | - | 17.5 | 8.5   |
| QCP2_06 | -     | -     | -24.0 | -13.6 | 60    | 0.617 | 0.08 | 18.40  | - | - | 17.8 | 7.9   |
| QCP2_07 | -65.0 | -     | -     | -     | -     | -     | -    | -      | - | - | -    | -     |
| QCP2_08 | -     | -     | -22.8 | -14.0 | 50.6  | 0.605 | 0.06 | 17.98  | - | - | 20.4 | 4.8   |

|         |       |       |       |       |       |       |      |        |   |      |      |      |
|---------|-------|-------|-------|-------|-------|-------|------|--------|---|------|------|------|
| QCP2_09 | -     | -     | -     |       | 70.1  | -     | -    | -      | - | -    | -    | -    |
| QCP2_10 | -     | -     | -23.0 | -12.0 | 77    | 0.596 | 0.09 | 18.48  | - | -    | 20.2 | 5.3  |
| QCP2_11 | -     | -     | -     | -     | 72    | -     | -    | -      | - | -    | -    | -    |
| QCP2_12 | -61.0 | -     | -     | -     | 82    | -     | -    | -      | - | -    | -    | -    |
| QCP2_13 | -     | -     | -     | -     | 53    | -     | -    | -      | - | -    | -    | -    |
| QCP2_14 | -     | -     | -23.0 | -11.5 | 71    | 0.609 | 0.08 | 18.37  | - | -    | 20.2 | 5.3  |
| QCP3_01 | -59.1 | -48.2 | -23.8 | -6.5  | 54.3  | 0.612 | 0.07 | 18.19  | - | -    | 19.1 | 7.2  |
| QCP3_02 | -     | -     | -     | -     | -     | -     | -    | -      | - | -    | -    | -    |
| QCP3_03 | -52.1 | -     | -24.2 | -9.6  | 66.8  | 0.615 | 0.09 | 18.50  | - | -    | 17.9 | 8.2  |
| QCP3_04 | -51.6 | -     | -     | -     | 56.4  | -     | -    | -      | - | -    | -    | -    |
| QCP3_05 | -     | -     | -     | -     | 41.6  | -     | -    | -      | - | -    | -    | -    |
| QCP3_06 | -     | -     | -25.0 | -12.3 | 57    | 0.616 | 0.09 | 18.48  | - | -    | 16.1 | 10   |
| QCP3_07 | -     | -     | -25.7 | -14.0 | 57.2  | 0.616 | 0.09 | 18.57  | - | -    | 14.8 | 11.4 |
| QCP3_08 | -     | -     | -     | -     | -     | -     | -    | -      | - | -    | -    | -    |
| QCP3_09 | -     | -     | -     | -     | -     | -     | -    | -      | - | -    | -    | -    |
| QCP3_10 | -     | -     | -     | -     | -     | -     | -    | -      | - | -    | -    | -    |
| QCP3_11 | -80.3 | -     | -     | -     | 67.3  | -     | -    | -      | - | -    | -    | -    |
| QCP3_12 | -70.3 | -53.2 | -25.3 |       | 58    | -     | -    | -      | - | -    | -    | -    |
| QCP3_13 | -71.4 | -     | -26.3 | -7.5  | 62.5  | 0.617 | 0.1  | 18.65  | - | -    | 14.6 | 12.3 |
| QCP3_14 | -     | -     | -     | -     | 62    | -     | -    | -      | - | -    | -    | -    |
| QCP3_15 | -     | -     | -24.5 | -8.5  | 78    | 0.593 | 0.1  | 18.69  | - | -    | 17.5 | 8.6  |
| QCP3_16 | -     | -     | -25.0 | -13.0 | 68    | 0.613 | 0.09 | 18.638 | - | -    | 16.0 | 10   |
| QCP3_17 | -     | -     | -28.0 | -25.0 | 56    | 0.615 | 0.1  | 18.725 | - | -    | 10.3 | 15.6 |
| QCP4_01 | -59.0 | -47.7 | -24.0 | -16.8 | 72    | 0.607 | 0.09 | 18.612 | - | -    | 17.4 | 7.9  |
| QCP4_02 | -     | -     | -24.0 | -17.2 | 74    | 0.603 | 0.09 | 18.647 | - | -    | 17.3 | 7.9  |
| QCP4_03 | -51.7 | -     | -     | -17.4 | 63    | -     | -    | -      | - | -    | -    | -    |
| QCP4_04 | -     | -     | -21.7 | -11.0 | 54    | 0.612 | 0.04 | 17.55  | - | -    | 23.6 | 1.6  |
| QCP4_05 | -     | -     | -22.0 | -15.0 | 57    | 0.616 | 0.06 | 17.85  | - | -    | 22.2 | 2.6  |
| QCP4_06 | -     | -     | -23.4 | -17.4 | 67    | 0.614 | 0.09 | 18.46  | - | -    | 18.5 | 6.5  |
| QCP4_07 | -78.2 |       | -     | -     | 62    | -     | -    | -      | - | -    | -    | -    |
| QCP4_08 | -     |       | -24.2 | -     | 58    | -     | -    | -      | - | -    | -    | -    |
| QCP4_09 | -     |       | -23.7 | -     | 66    | -     | -    | -      | - | -    | -    | -    |
| QCP4_10 | -80.3 | -54.1 | -22.4 | -     | 52.2  | -     | -    | -      | - | -    | -    | -    |
| QCP4_11 | -     |       | -     | -     | 43.5  | -     | -    | -      | - | -    | -    | -    |
| QCP4_12 | -     |       | -     | -     | 42.7  | -     | -    | -      | - | -    | -    | -    |
| QCP4_13 | -     |       | -     | -     | 43.5  | -     | -    | -      | - | -    | -    | -    |
| QCP4_14 | -     |       | -     | -     | 54    | -     | -    | -      | - | -    | -    | -    |
| QCP4_15 | -     |       | -23.7 | -9.8  | 54    | 0.612 | 0.08 | 18.21  | - | -    | 18.9 | 7.1  |
| QCP4_16 | -     |       | -25.0 | -15.0 | 47    | 0.594 | 0.08 | 18.37  | - | -    | 15.8 | 10.1 |
| DP1_01  | -     |       | -27.8 | -     | 127   | 0.45  | 0.13 | 19.51  | - | 23.6 | -    | -    |
| DP1_02  | -     |       | -     | -     | 150   | -     | -    | -      | - | -    | -    | -    |
| DP1_03  | -     |       | -25.8 | -     | 157.6 | 0.539 | 0.15 | 19.86  | - | 22.8 | -    | -    |
| DP1_04  | -     |       | -26.7 | -     | 152   | 0.502 | 0.15 | 19.81  | - | 23.5 | -    | -    |
| DP1_05  | -     |       | -28.0 | -     | 135   | 0.45  | 0.14 | 19.61  | - | 24.0 | -    | -    |
| DP1_06  | -     |       | -     | -     | 158   | -     | -    | -      | - | -    | -    | -    |
| DP1_07  | -     |       | -26.3 | -     | 149   | 0.487 | 0.15 | 19.76  | - | 23.3 | -    | -    |



|        |   |       |   |       |       |      |       |     |      |   |   |
|--------|---|-------|---|-------|-------|------|-------|-----|------|---|---|
| DP1_08 | - | -26.5 | - | 158.5 | 0.546 | 0.15 | 19.88 | -   | 23.2 | - | - |
| DP1_09 | - | -     | - | 154   | -     | -    | -     | -   | -    | - | - |
| DP1_10 | - | -26.5 | - | 155   | 0.52  | 0.15 | 19.84 | -   | 23.4 | - | - |
| DP1_11 | - | -27.2 | - | 143   | 0.464 | 0.14 | 19.70 | -   | 23.6 | - | - |
| DP1_12 | - | -26.8 | - | 155   | 0.52  | 0.15 | 19.85 | -   | 23.5 | - | - |
| DP1_13 | - | -28.6 | - | 154   | 0.514 | 0.15 | 19.86 | -   | 24.2 | - | - |
| DP1_14 | - | -25.5 | - | 167   | 0.627 | 0.15 | 19.99 | -   | 23.0 | - | - |
| AP1_01 | - | -2.2  | - | 106   | 0.499 | 0.06 | 18.96 | 3.7 | -    | - | - |
| AP1_02 | - | -1.8  | - | 109   | 0.489 | 0.06 | 18.97 | 3.0 | -    | - | - |
| AP1_03 | - | -2.0  | - | 85    | 0.572 | 0.05 | 18.72 | 3.4 | -    | - | - |
| AP1_04 | - | -2.0  | - | 93    | 0.545 | 0.05 | 18.80 | 3.4 | -    | - | - |
| AP1_05 | - | -2.3  | - | 98    | 0.527 | 0.06 | 18.87 | 3.9 | -    | - | - |
| AP1_06 | - | -2.1  | - | 92    | 0.548 | 0.05 | 18.80 | 3.6 | -    | - | - |
| AP1_07 | - | -1.7  | - | 81    | 0.585 | 0.04 | 18.66 | 2.9 | -    | - | - |
| AP1_08 | - | -2.7  | - | 89    | 0.559 | 0.05 | 18.81 | 4.6 | -    | - | - |
| AP1_09 | - | -1.6  | - | 100   | 0.519 | 0.05 | 18.85 | 2.7 | -    | - | - |
| AP1_10 | - | -1.9  | - | 108   | 0.492 | 0.06 | 18.96 | 3.2 | -    | - | - |
| AP1_11 | - | -2.5  | - | 87    | 0.566 | 0.05 | 18.78 | 4.2 | -    | - | - |
| AP1_12 | - | -     | - | 83    | -     | -    | -     | -   | -    | - | - |
| AP1_13 | - | -     | - | 91    | -     | -    | -     | -   | -    | - | - |
| AP1_14 | - | -     | - | 92    | -     | -    | -     | -   | -    | - | - |
| AP1_15 | - | -     | - | 89    | -     | -    | -     | -   | -    | - | - |
| AP1_16 | - | -     | - | 96    | -     | -    | -     | -   | -    | - | - |
| AP1_17 | - | -     | - | 103   | -     | -    | -     | -   | -    | - | - |
| AP1_18 | - | -     | - | 90    | -     | -    | -     | -   | -    | - | - |
| AP1_19 | - | -     | - | 61    | -     | -    | -     | -   | -    | - | - |
| AP1_20 | - | -     | - | 97    | -     | -    | -     | -   | -    | - | - |
